# Supplementary material for: Sol–gel preparation of low oxygen content, high surface area silicon nitride and imidonitride materials
Source: Royal Society of Chemistry journal article supplement (doi:10.1039/c5dt04961j), 2016-01-01
Supplement: c5dt04961j1.pdf [file c5dt04961j1.pdf]

## Supporting Information: Sol-Gel Preparation of Low Oxygen Content, High Surface Area Silicon Nitride and Imidonitride Materials

Kripasindhu Sardar,<sup>a</sup> Richard Bounds,<sup>a</sup> Marina Carravetta,<sup>a</sup> Geoffrey Cutts,<sup>b</sup> Justin S. J. Hargreaves,<sup>c</sup> Andrew L. Hector,<sup>a,\*</sup> Joseph A. Hriljac,<sup>b</sup> William Levason<sup>a</sup> and Felix Wilson<sup>a</sup>

<sup>a</sup> Chemistry, University of Southampton, Southampton SO17 1BJ, UK. [a.l.hector@soton.ac.uk](mailto:a.l.hector@soton.ac.uk)

<sup>b</sup> School of Chemistry, University of Birmingham, Birmingham B15 2TT, UK

<sup>c</sup> School of Chemistry, University of Glasgow, Glasgow G12 8QQ, UK

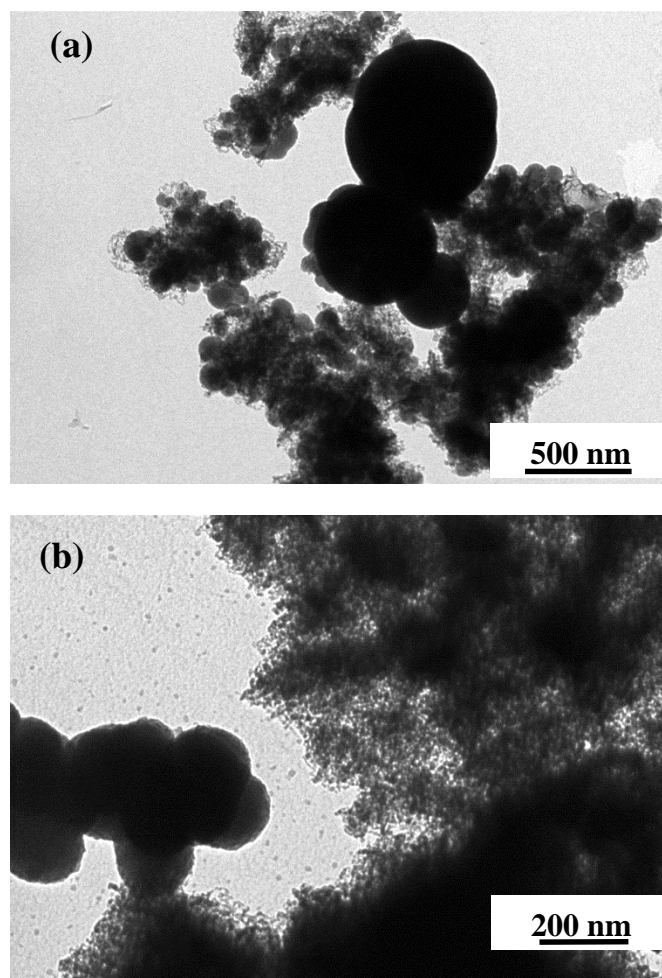

**Fig. S1** Typical TEM images of silicon imidonitride samples prepared from (a) concentrated gel (5%  $[\text{NH}_4][\text{OTf}]$ , pyrolysis condition 200 °C/2 h + 1000 °C/2 h) and (b) dilute -gel (10%  $[\text{NH}_4][\text{OTf}]$ , 200 °C/2 h + 800 °C/2 h)

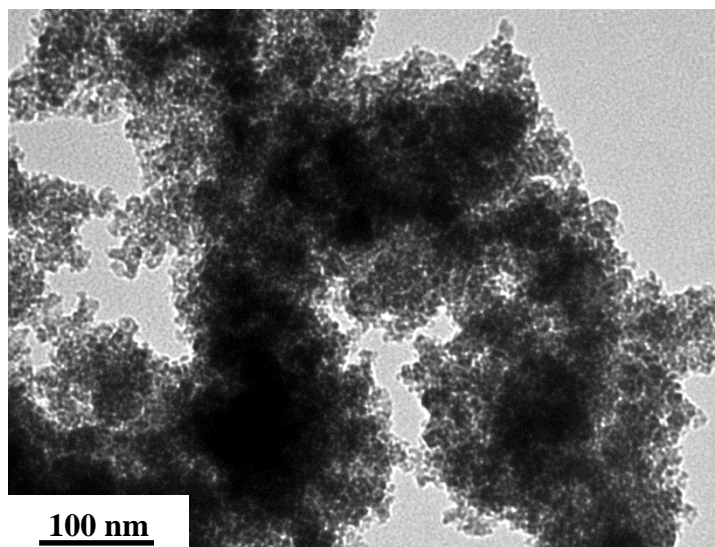

**Fig. S2** Typical TEM image of silicon imidonitride prepared by heating a xerogel made with 0.4%  $[\text{NH}_4][\text{OTf}]$  at 200 °C for 6 h under  $\text{NH}_3$ .

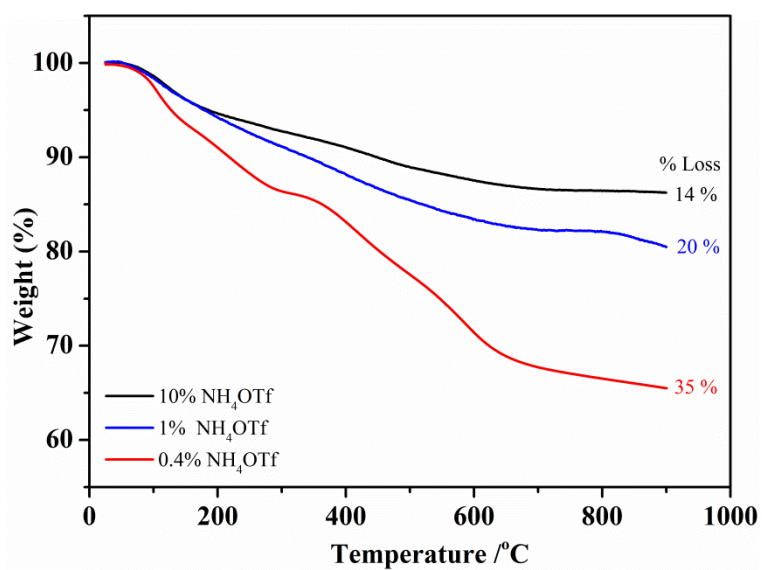

**Fig. S3** TGA traces of silicon imidonitride xerogels prepared with varying ammonium triflate concentrations.

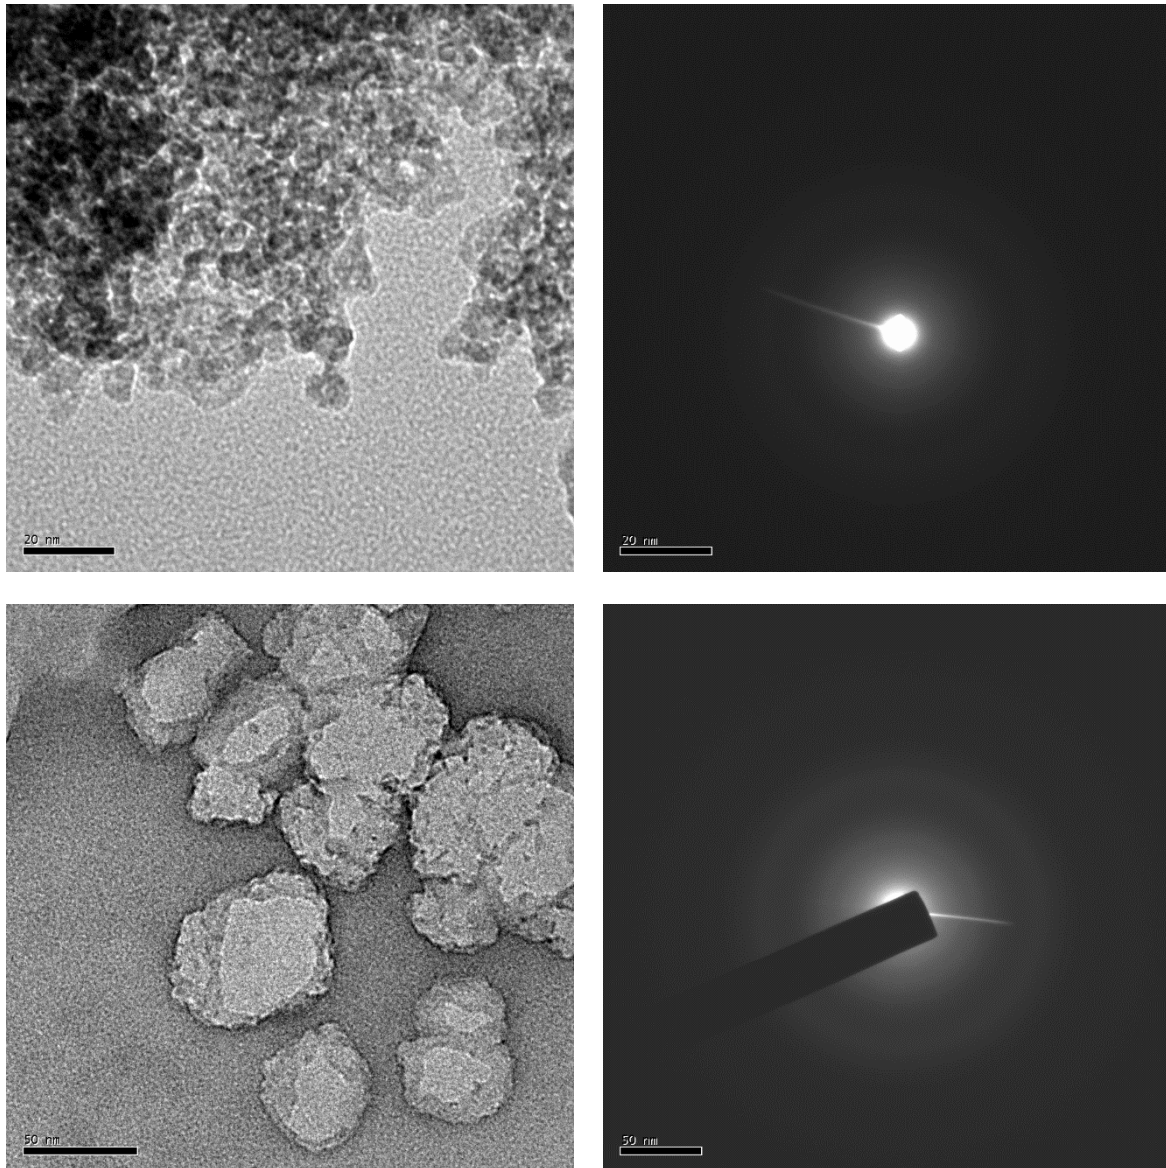

**Fig. S4** TEM images (left) and selected area electron diffraction (right) of silicon imidonitride produced at 1200 °C (top) and amorphous regions of silicon imidonitride produced at 1400 °C (bottom).

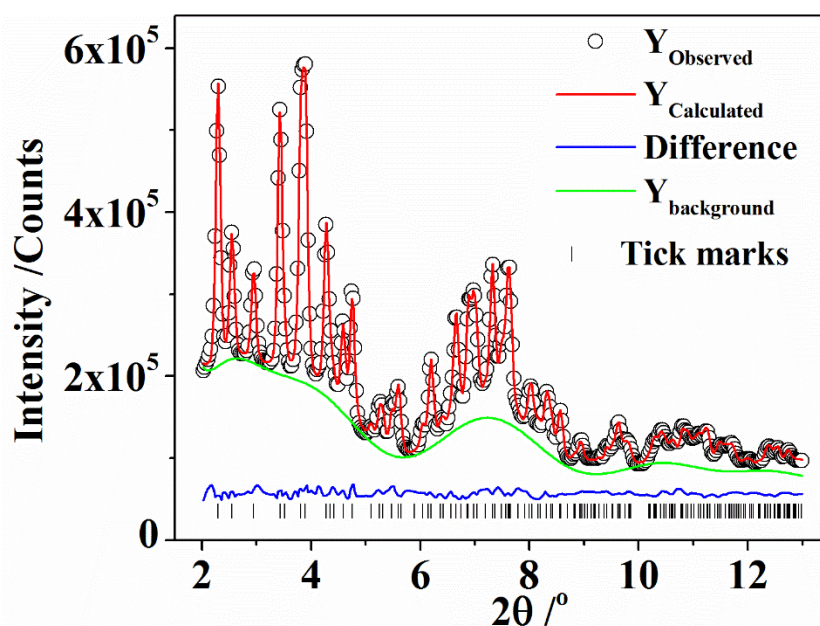

**Fig. S5** Rietveld refinement of Bragg diffraction pattern ( $\lambda = 0.1722 \text{ \AA}$ ,  $d$  spacing range  $0.76\text{--}4.88 \text{ \AA}$ , 2D image integrated with a step size of  $0.0275^\circ$ ) of silicon imidonitride samples synthesised at  $1400 \text{ }^\circ\text{C}/18 \text{ h}$  from a xerogel obtained with  $0.4\%$   $[\text{NH}_4][\text{OTf}]$ . Tick marks correspond to  $\alpha\text{-Si}_3\text{N}_4$  in space group  $P31c$  (159)  $R_{\text{wp}} = 1.84\%$   $R_p = 1.44\%$ .

**Table S1** Refined atomic coordinates of crystalline silicon nitride sample synthesised at  $1400 \text{ }^\circ\text{C}$  for  $18 \text{ h}$ . Tick marks correspond to  $\alpha\text{-Si}_3\text{N}_4$  in space group  $P31c$  (159). Lattice parameters are  $a = 7.7806(10) \text{ \AA}$  and  $c = 5.6423(10) \text{ \AA}$ . Unit cell volume  $V = 295.81(8) \text{ \AA}^3$ .

| Atom | Wyckoff symbol | x          | y          | z          | $U_{\text{iso}} \times 100$ | Occupancy |
|------|----------------|------------|------------|------------|-----------------------------|-----------|
| Si1  | 6c             | 0.0810(6)  | 0.5135(6)  | 0.6570(14) | 1.33(9)                     | 1         |
| Si2  | 6c             | 0.2551(5)  | 0.1672(5)  | 0.4539(14) | 1.33(9)                     | 1         |
| N1   | 6c             | 0.6478(12) | 0.6108(13) | 0.420(3)   | 0.41(13)                    | 1         |
| N2   | 6c             | 0.3100(13) | 0.3196(12) | 0.712(3)   | 0.41(13)                    | 1         |
| N3   | 2b             | 0.3333     | 0.6667     | 0.614(3)   | 0.41(13)                    | 1         |
| N4   | 2a             | 0.0000     | 0.0000     | 0.452(4)   | 0.41(13)                    | 1         |

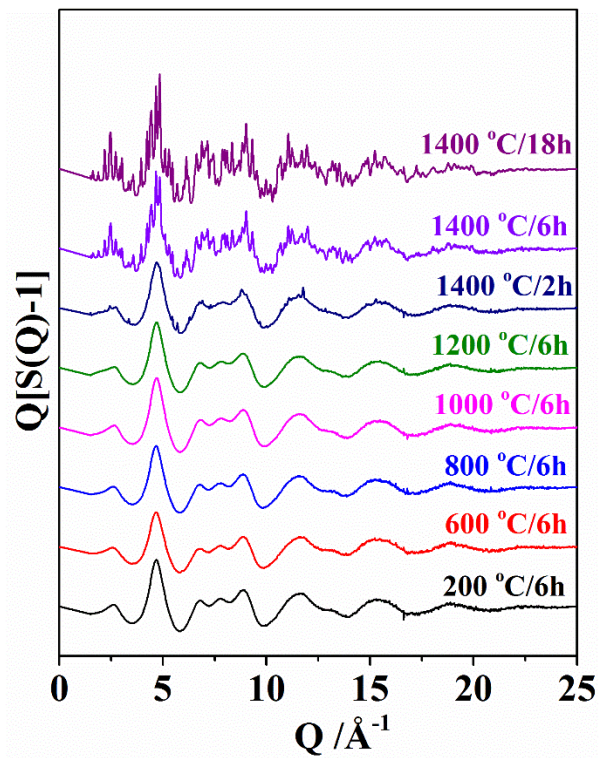

**Fig. S6** Reduced total scattering structure function  $F(Q)$  defined as  $Q[S(Q)-1]$  derived from diffraction patterns of samples prepared by nitridation within a temperature range of 200-1400 °C. Patterns have been equally offset along the Y axis.

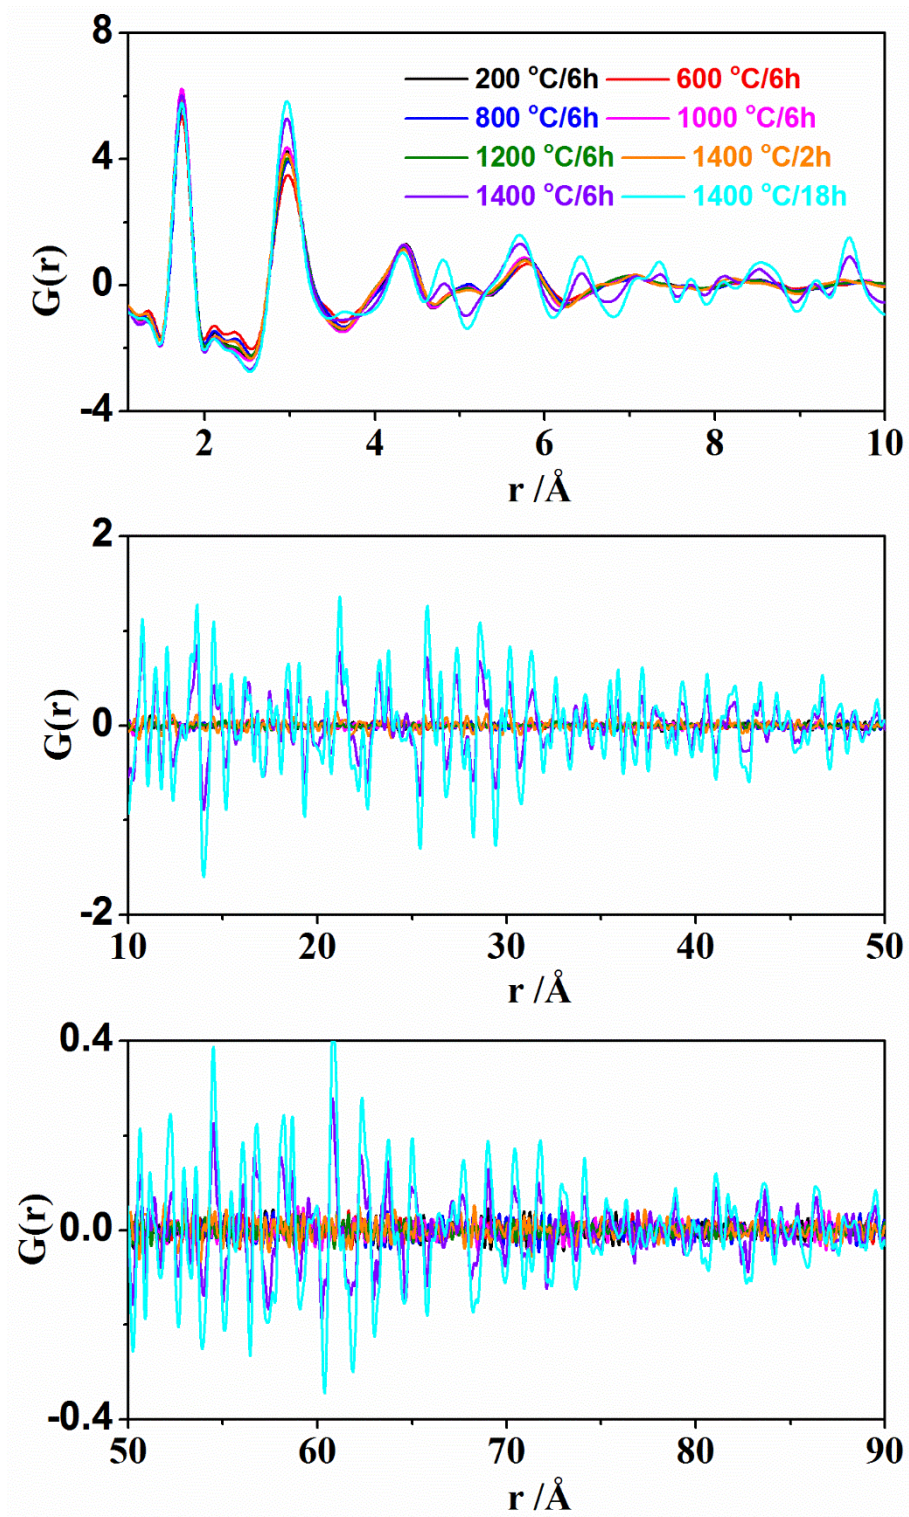

**Fig. S7** Pair distribution function  $G(r)$  for silicon imidonitride samples prepared within a temperature range of 200-1400 °C shown in three different  $r$  regions.

**Table S2** Summary of PDFGUI refined parameters for the silicon imidonitride sample synthesised at 1400 °C for 18 h

|                                    |             |
|------------------------------------|-------------|
| <b>Q<sub>damp</sub></b>            | 0.146(12)   |
| <b>a / Å</b>                       | 7.763(14) Å |
| <b>c / Å</b>                       | 5.609(17) Å |
| <b>Scale factor</b>                | 0.96(4)     |
| <b>delta2</b>                      | 1.9(2)      |
| <b>S<sub>ratio</sub></b>           | 1.3(3)      |
| <b>N<sub>uiso</sub></b>            | 0.0059(19)  |
| <b>Si<sub>uiso</sub></b>           | 0.0033(11)  |
| <b>R<sub>w</sub></b>               | 0.20611     |
| <b>Reduced <math>\chi^2</math></b> | 0.0928898   |

In order to account for correlated motion Delta2 was initially refined and then S<sub>ratio</sub> was refined with a Rcut value of 10 Å (the full data range).

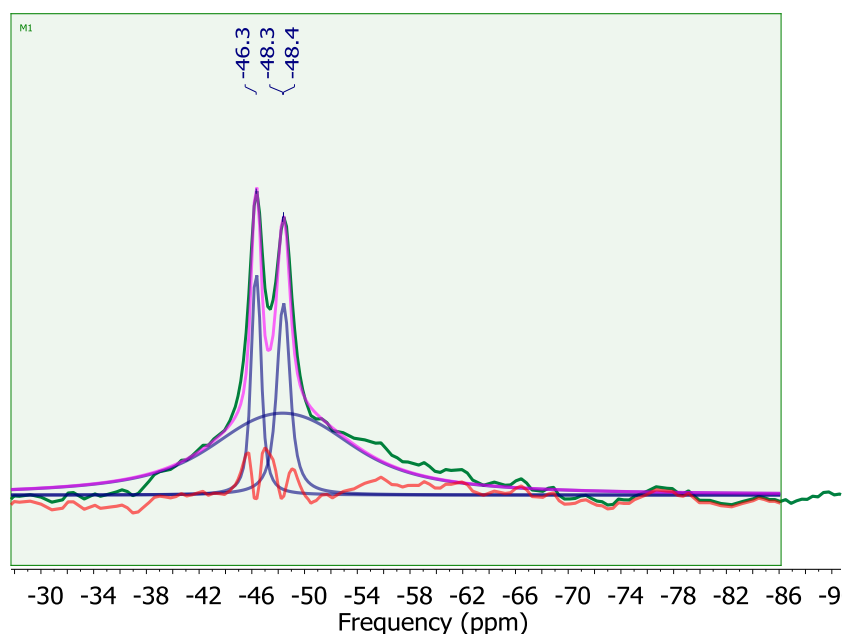

**Fig. S8** <sup>29</sup>Si MAS-NMR peak deconvolution of silicon imidonitride sample synthesised at 1400 °C for 18 h. The sharp crystalline peaks are at 46.3 and 48.4 ppm and the broad amorphous peak at 48.3 ppm. The difference between the measured and modelled spectra is shown in red.

**Table S3** Results from fitting of NMR spectra (note a, b refers to two sharp peaks, c is a broad component)

| Cross polarisation data |                      |       |           |           |      |           |
|-------------------------|----------------------|-------|-----------|-----------|------|-----------|
|                         | #                    | ppm   | Height    | Width(Hz) | L/G  | Area      |
| 600C /6h                | 1                    | -42.6 | 5818619.8 | 1249      | 1.67 | 363153264 |
| 800C /6h                | 2                    | -44.3 | 6183609.2 | 1390      | 1.59 | 435389284 |
| 1000C /6h               | 3                    | -47   | 5850103.8 | 1772      | 2    | 488208166 |
| 1200C /6h               | 4                    | -46.8 | 5854589.5 | 1742      | 2    | 480266214 |
| 1400C/2h                | 5                    | -47.3 | 5809316.5 | 1813      | 2    | 496129536 |
| 1400C/6h                | 6                    | -47.2 | 5491038.8 | 1942      | 2    | 502150110 |
| 1400C/18h               | 7a                   | -47.4 | 4906927.8 | 1988      | 1.55 | 497121782 |
| 1400C/18h               | 7b                   | -45   |           |           |      |           |
|                         |                      |       |           |           |      |           |
| One pulse data          |                      |       |           |           |      |           |
|                         | #                    | ppm   | Height    | Width(Hz) | L/G  | Area      |
| 1000C/6h                | 1                    | -47.4 | 1668.2    | 1808      | 2    | 142051.97 |
| 1200C/6h                | 2                    | -48.7 | 1662.41   | 1707      | 2    | 133687.12 |
| 1400C/2h                | 3                    | -48.3 | 1601.09   | 1596      | 2    | 120375.66 |
| 1400C/6h                | 4a (Sharp Component) | -46.6 | 818.95    | 148       | 1    | 6768.224  |
| 1400C/6h                | 4b (Sharp component) | -48.7 | 812.47    | 137       | 0.68 | 6523.286  |
| 1400C/6h                | 4c (Broad component) | N/A   | 859.15    | 2063      | 0.79 | 101899.7  |
| 1400C/18h               | 5a (Sharp component) | -46.3 | 1372.24   | 107       | 0.96 | 8204.346  |
| 1400C/18h               | 5b (Broad component) | N/A   | 450.41    | 1515      | 0.58 | 40463.565 |
| 1400C/18h               | 5c (Sharp component) | -48.4 | 1214.37   | 141       | 0.6  | 10125.023 |
